# Supplementary material for: High-performance flexible electron field emitters fabricated from doped crystalline Si pillar films on polymer substrates
Source: Royal Society of Chemistry journal article supplement (doi:10.1039/c6ra10255g), 2016-01-01
Supplement: c6ra10255g1.pdf [file c6ra10255g1.pdf]

1 **High-Performance Flexible Electron Field Emitters Fabricated from Doped**  
2 **Crystalline Si Pillar Films on Polymer Substrates**

3

4 Ping-Yen Hsieh, Duc-Dung Nguyen, Chi-Young Lee and Nyan-Hwa Tai\*

5

6 Department of Materials Science and Engineering, National Tsing Hua University, No.

7 101, Section 2, Kuang-Fu Road, Hsinchu 30013, Taiwan, R.O.C.

8

9

10

11

12

13

14

15

16

17

18

19

20 \* Corresponding author: Nyan-Hwa Tai

21 Postal address: Department of Materials Science and Engineering, National Tsing Hua

22 University, No. 101, Section 2, Kuang-Fu Road, Hsinchu 30013, Taiwan, R.O.C.

23 Tel.: +866 3 5715131 #42568

24 Fax: + 886 3 5737406

25 E-mail address: nhtai@mx.nthu.edu.tw

# 1 Supporting information

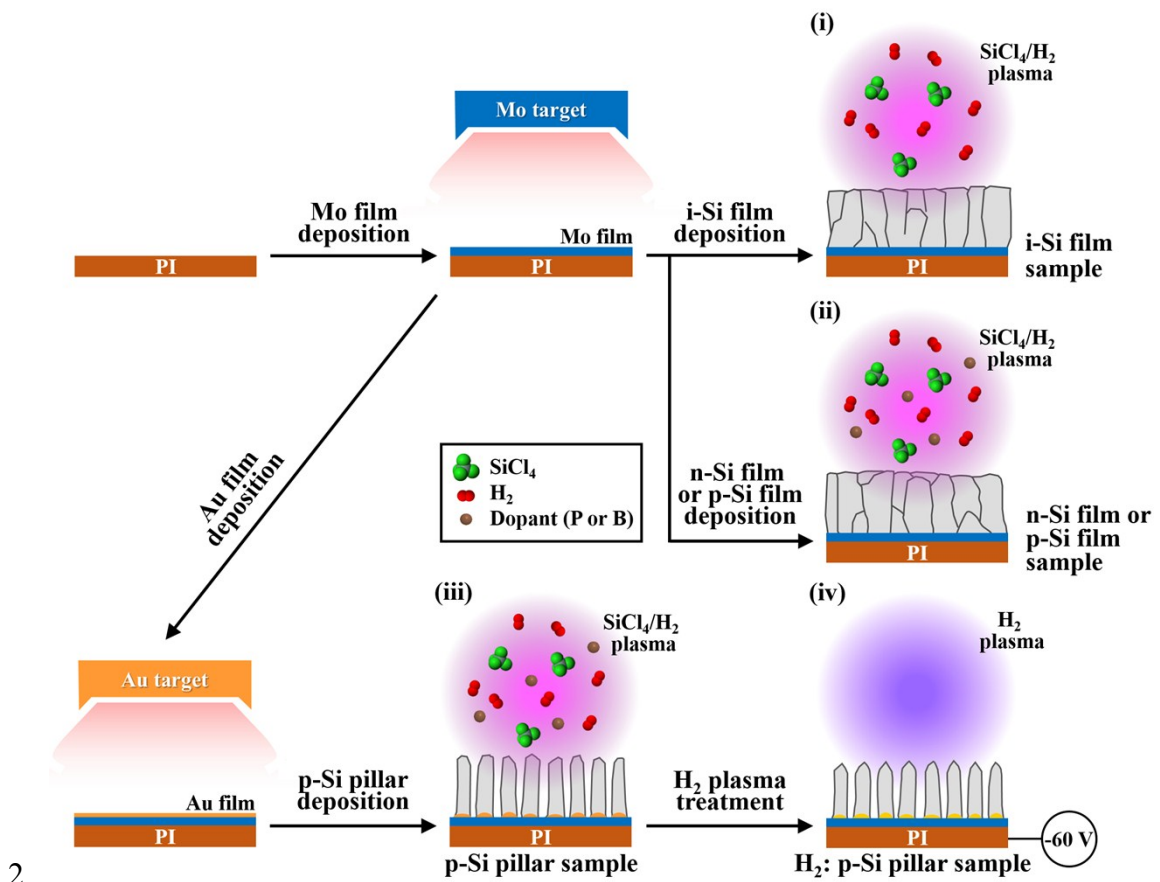

2  
3 Fig. S1 Flowchart of the preparation processes for synthesized crystalline Si film  
4 samples possessing different structures: (i) i-Si film sample, (ii) n-Si film or p-Si film  
5 samples, (iii) p-Si pillar sample and (iv) H<sub>2</sub>: p-Si pillar sample.

6

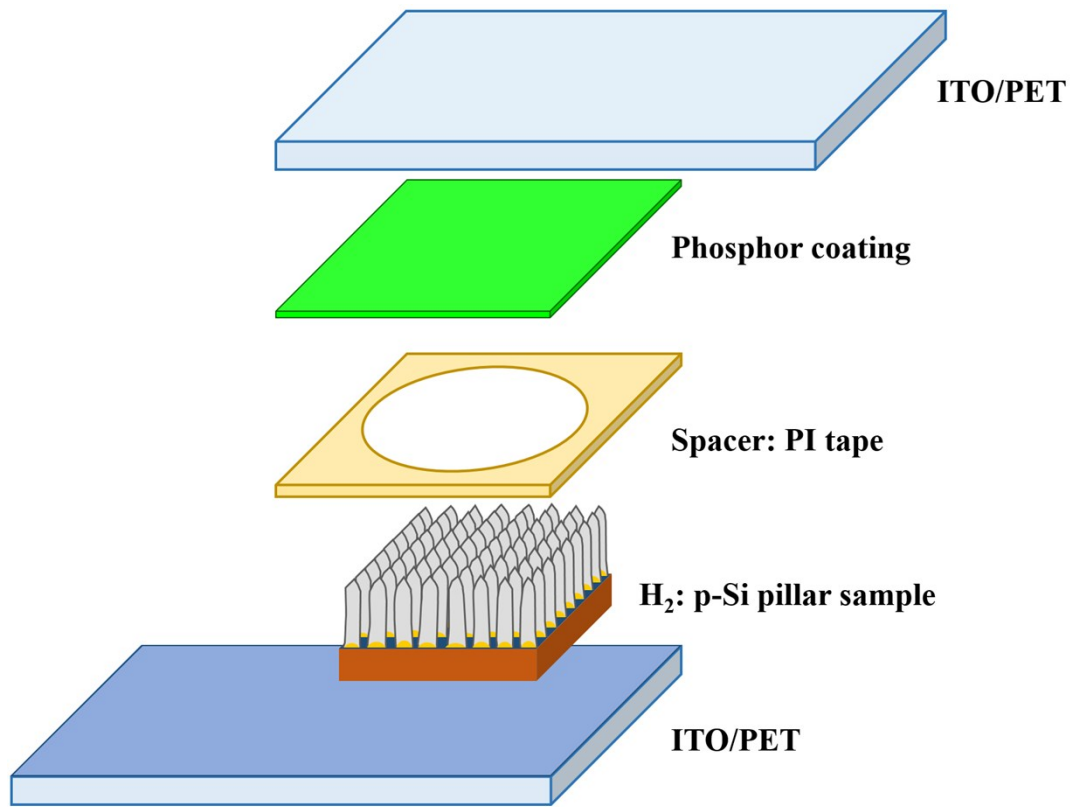

Fig. S2 Schematics of components for Si-EFE prototype device used in this study

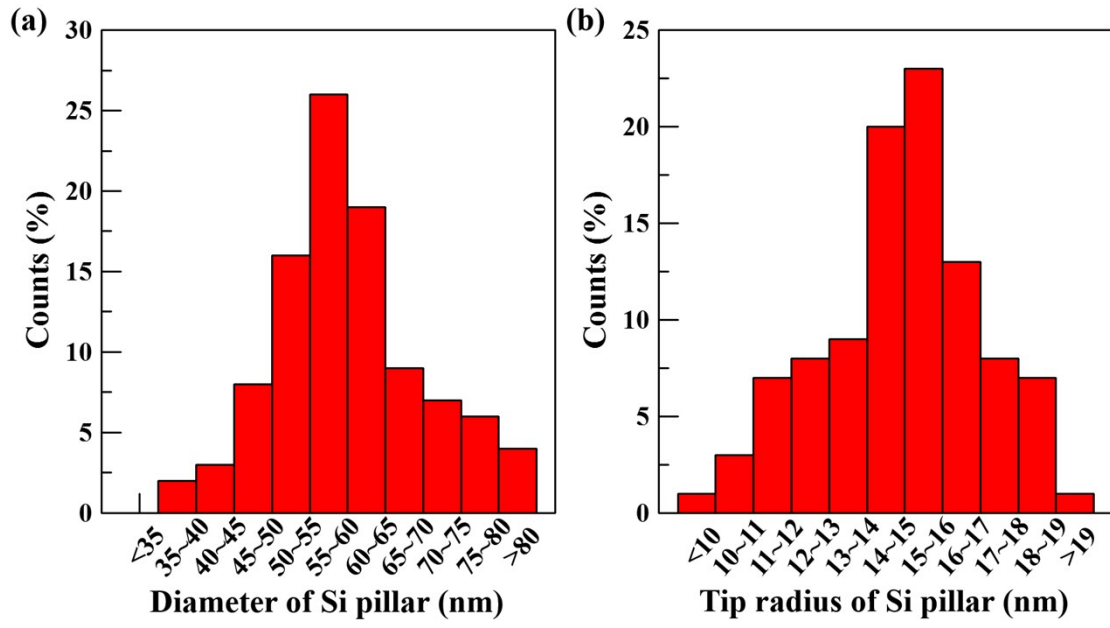

1

Fig. S3 Statistics of diameter and tip radius for Si pillar structure.

2
